# Supplementary material for: Study on the prevalence of Bovine Trypanosomiasis and Associated Risk Factors in Dangur District, metekel zone, North-western Ethiopia
Source: Research Square preprint supplement (doi:10.21203/rs.3.rs-7497458/v1), 2025-09-18
Supplement: Supplementary file 1 [file e9e4784bf6a72ff3443eabc0.pdf]

## Questionnaire Survey

**Title:** Study on the prevalence of Bovine Trypanosomiasis and Associated Risk Factors in Dangur District, metekel zone, North-western Ethiopia

### Section 1: Demographic Information

1. **Sex:**  
☐ Male      ☐ Female
2. **Age:**  
☐ <20      ☐ 21–30      ☐ 31–40      ☐ 41–50      ☐ >50
3. **Educational Level:**  
☐ No formal education      ☐ Primary education  
☐ Secondary education      ☐ College/University
4. **Years of Experience in Livestock Rearing:**  
☐ 1–5      ☐ 6–10      ☐ 11–15      ☐ >15
5. **Kebele (Village) of Residence:** \_\_\_\_\_
6. **Number of Cattle Owned:**  
☐ 1–5      ☐ 6–10      ☐ 11–20      ☐ >20

### Section 2: Knowledge of Trypanosomosis

7. **Have you heard of bovine trypanosomosis (Gendi)?**  
☐ Yes      ☐ No
8. **If yes, what are the common signs and symptoms you observe in affected cattle?**  
(You may select more than one)  
☐ Weight loss  
☐ Weakness/laziness  
☐ Hair roughness  
☐ Abortion  
☐ Reduced milk production  
☐ Death  
☐ Others (please specify): \_\_\_\_\_
9. **What do you believe are the causes of the disease?**  
☐ Fly bites (tsetse or others)  
☐ Grazing in certain areas  
☐ Supernatural causes

- ☐ Don't know  
☐ Others (please specify): \_\_\_\_\_

### **Section 3: Seasonality and Transmission**

**10. In which seasons do you observe more cases of trypanosomosis in your cattle?**

- ☐ Rainy season  
☐ Dry season  
☐ Both equally  
☐ Not sure

**11. Do you notice an increase in biting flies during certain seasons?**

- ☐ Yes      ☐ No

If yes, which season? \_\_\_\_\_

**12. Do you believe the disease can spread from one animal to another?**

- ☐ Yes      ☐ No      ☐ Not sure

### **Section 4: Management and Control Practices**

**13. What actions do you take when your cattle show symptoms of trypanosomosis?**

- ☐ Visit veterinary clinic  
☐ Use traditional/herbal treatment  
☐ Do nothing  
☐ Others (please specify): \_\_\_\_\_

**14. How often do you access veterinary services in your area?**

- ☐ Frequently      ☐ Occasionally      ☐ Rarely      ☐ Never

**15. Are tsetse fly control methods used in your area?**

- ☐ Yes      ☐ No      ☐ Not sure

If yes, which methods?

- ☐ Insecticide spraying  
☐ Fly traps  
☐ Clearing bushes  
☐ Others (please specify): \_\_\_\_\_

**16. Do you use any indigenous or local practices to prevent or control the disease?**

- ☐ Yes      ☐ No

If yes, please describe: \_\_\_\_\_

## **Section 5: Additional Comments**

**17. Do you have any suggestions on how trypanosomosis could be better controlled in your area?**

---

---

---
